# Supplementary material for: Knockdown of carnitine palmitoyltransferase I (CPT1) reduces fat body lipid mobilization and resistance to starvation in the insect vector Rhodnius prolixus
Source: Frontiers journal article supplement (doi:10.3389/fphys.2023.1201670), 2023-07-04
Supplement: Data_Sheet_2.PDF [file Data_Sheet_2.PDF]

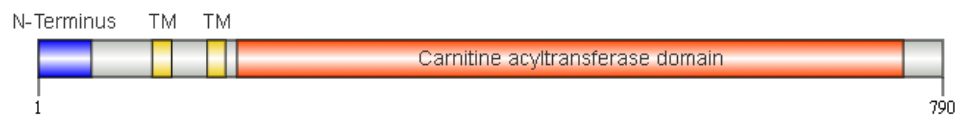

**Supplementary Figure 1: RhoprCPT1 predicted protein structure.** RhoprCPT1 protein structure was predicted based on searches against PFAM conserved domains database. The image was generated with IBS 2.0. N-terminus: blue; transmembrane domains (TM): yellow; carnitine acyltransferase domain: red.
