# Supplementary material for: Knockdown of carnitine palmitoyltransferase I (CPT1) reduces fat body lipid mobilization and resistance to starvation in the insect vector Rhodnius prolixus
Source: Frontiers journal article supplement (doi:10.3389/fphys.2023.1201670), 2023-07-04
Supplement: Data_Sheet_3.PDF [file Data_Sheet_3.PDF]

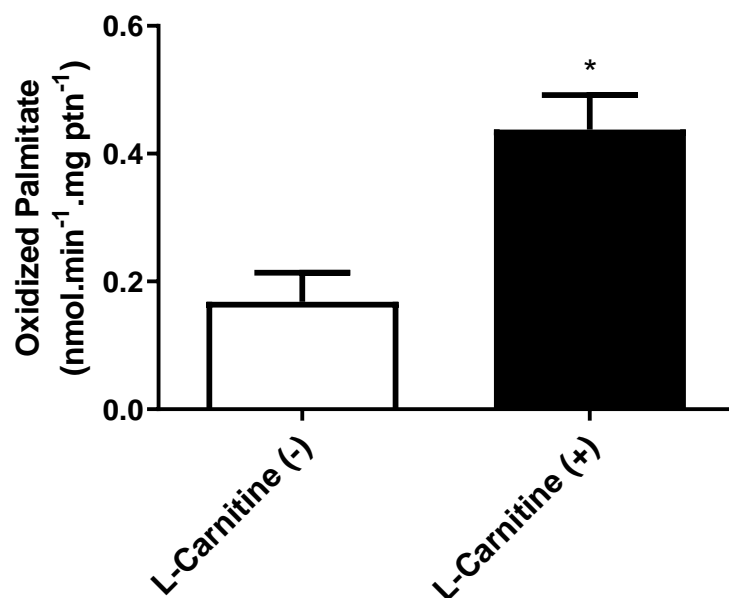

**Supplementary Figure 2: Fatty acid oxidation in the fat body is stimulated by carnitine.** Adult females were dissected before feeding (day 0) and their fat bodies were collected. After homogenization, the samples were used in  $\beta$ -oxidation assays, as described in Material and Methods, in the absence (-) or presence (+) of 100 nM L-carnitine. Results are  $\pm$  means  $\pm$  SEM. (\*): significantly different with  $p < 0.05$ , by the Student's  $t$  test,  $n = 3$ .
